# Supplementary material for: Sources of anions in aerosols in northeast Greenland during late winter
Source: Copernicus journal article supplement (doi:10.5194/acp-13-1569-2013), 2013-02-07
Supplement: Supplementary file 1 [file FigS1 caption.doc]

Figure S1. Comparison between data of wind speeds measured by sonic anemometer at Station Nord in spring 2011 and wind speeds from NCEP/DOE AMIP-II reanalysis data.
